# Supplementary material
Source: Springer Nature journal article supplement (http://publikationen.ub.uni-frankfurt.de/opus4/files/34572/12977_2013_3895_MOESM11_ESM.pdf)
Supplement: MOESM11 [file 12977_2013_3895_MOESM11_ESM.pdf]

top

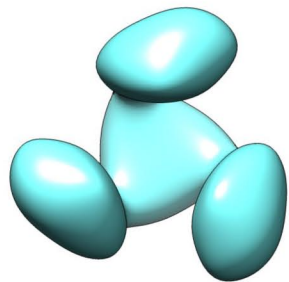

NL4-3/ADA

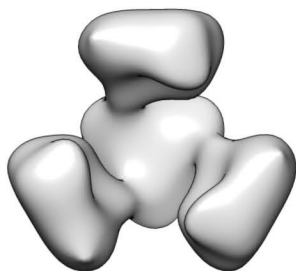

NL4-3 (X4)  
(lab adapted)

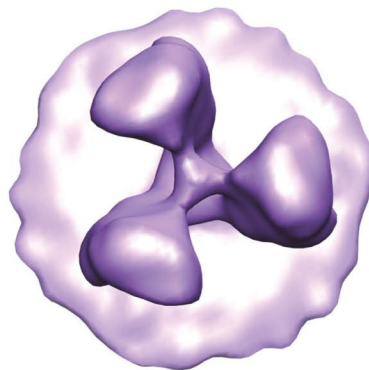

CD4 independent SIV

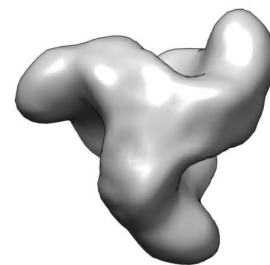

Bal (R5)  
(lab adapted)

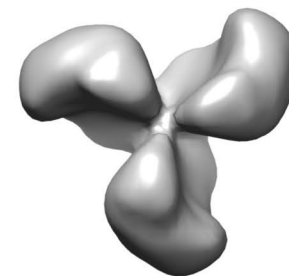

JRFL (R5)  
(primary)

side

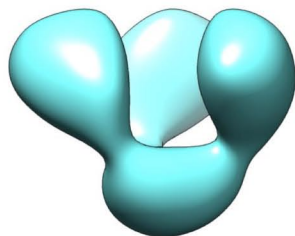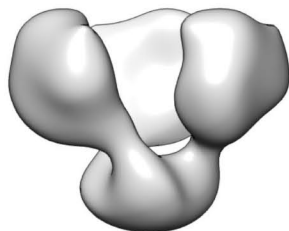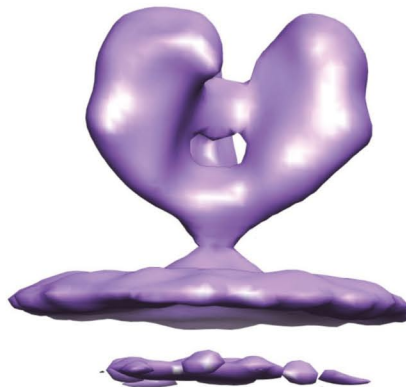

White et al., 2010, 2011

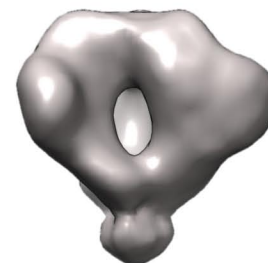

Liu et al., 2008  
Meyerson et al., 2012

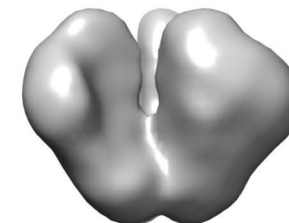

Harris et al., 2011

---

„open“

---

„closed“
